# Supplementary material for: Implementation interventions in preventing surgical site infections in abdominal surgery: a systematic review
Source: Springer Nature journal article supplement (doi:10.1186/s12913-020-4995-z), 2020-03-20
Supplement: MOESM2 [file 17819576]

## Additional file 2

**Table S2: Clinical interventions (SSI preventive measures) in the N=40 included studies**

| First author, year           | Clinical interventions (SSI preventive measures)                                                                                                                                                                                                                                                                                                                                                                                                                                                                                                                                                                                                                                                       |
|------------------------------|--------------------------------------------------------------------------------------------------------------------------------------------------------------------------------------------------------------------------------------------------------------------------------------------------------------------------------------------------------------------------------------------------------------------------------------------------------------------------------------------------------------------------------------------------------------------------------------------------------------------------------------------------------------------------------------------------------|
| Bull, 2011 [34]              | <ul style="list-style-type: none"> <li>- Normothermia</li> <li>- Oxygen delivery</li> <li>- Blood pressure monitoring</li> <li>- Diabetic control</li> <li>- Antibiotic prophylaxis</li> </ul>                                                                                                                                                                                                                                                                                                                                                                                                                                                                                                         |
| Cameron, 2015 [35]           | <ul style="list-style-type: none"> <li>- Antibiotic prophylaxis</li> </ul>                                                                                                                                                                                                                                                                                                                                                                                                                                                                                                                                                                                                                             |
| Cima, 2013 [36]              | <ul style="list-style-type: none"> <li>- Patient cleansing</li> <li>- Antibiotic prophylaxis</li> <li>- Chloraprep (incisional area)</li> <li>- Closing tray</li> <li>- Glove change before closure</li> <li>- Hand hygiene</li> <li>- Dressing removal</li> </ul>                                                                                                                                                                                                                                                                                                                                                                                                                                     |
| Connolly, 2016 [37]          | <ul style="list-style-type: none"> <li>- Bowel preparation</li> <li>- Shower with chlorhexidine</li> <li>- Chlorhexidine antimicrobial scrub of abdomen</li> <li>- Glucose control</li> <li>- Hair removal</li> <li>- Surgical masks</li> <li>- Minimize traffic and the OR door "left open" time</li> <li>- Chlorhexidine skin prep, extended skin prep area</li> <li>- Hand hygiene</li> <li>- Clean scrubs</li> <li>- Antibiotic prophylaxis</li> <li>- Normothermia</li> <li>- Incision drape</li> <li>- Wound retractor</li> <li>- Before closing: re-glove, re-prep, re-towel incision area, use clean instrument tray</li> <li>- Wound closure technique</li> <li>- Dressing changes</li> </ul> |
| Crolla, 2012 [38]            | <ul style="list-style-type: none"> <li>- Antibiotic prophylaxis</li> <li>- Hair removal</li> <li>- Normothermia</li> <li>- Discipline in the operating room</li> </ul>                                                                                                                                                                                                                                                                                                                                                                                                                                                                                                                                 |
| DeHaas, 2016 [39]            | <ul style="list-style-type: none"> <li>- Antibiotic prophylaxis</li> <li>- Preoperative warming</li> <li>- Hair removal</li> <li>- Chlorhexidine showers and wipes</li> <li>- Mechanical bowel preps</li> <li>- Normothermia</li> <li>- Chlorhexidine-alcohol surgical prep</li> <li>- Wound protectors</li> <li>- Clean closure trays</li> <li>- Gown and/or glove changes as appropriate</li> <li>- Redosing of antibiotics at appropriate time intervals</li> <li>- Dressing removal</li> </ul>                                                                                                                                                                                                     |
| Elia-Guedea, 2017 [40]       | <ul style="list-style-type: none"> <li>- Antibiotic prophylaxis</li> <li>- Restriction of staff transit in the operating room</li> <li>- Handling of wounds (dressings, gloves, surgical tools)</li> <li>- Wound care</li> </ul>                                                                                                                                                                                                                                                                                                                                                                                                                                                                       |
| Forbes, 2008 [41]            | <ul style="list-style-type: none"> <li>- Antibiotic prophylaxis</li> <li>- Normothermia</li> <li>- Glucose control</li> </ul>                                                                                                                                                                                                                                                                                                                                                                                                                                                                                                                                                                          |
| Frenette, 2016 [42]          | <ul style="list-style-type: none"> <li>- Antibiotic prophylaxis</li> <li>- Hair removal</li> <li>- Shower with chlorhexidine</li> <li>- Skin antisepsis</li> <li>- Operating room ventilation</li> <li>- Hand washing</li> <li>- Sterile clothing</li> <li>- Sterile operating room and equipment</li> </ul>                                                                                                                                                                                                                                                                                                                                                                                           |
| Garcell, 2017 [43]           | <ul style="list-style-type: none"> <li>- Antibiotic prophylaxis</li> <li>- Antimicrobial consumption</li> </ul>                                                                                                                                                                                                                                                                                                                                                                                                                                                                                                                                                                                        |
| Geubbels, 2004 [44]          | <ul style="list-style-type: none"> <li>- Antibiotic prophylaxis (Hospital E, abdominal surgery)</li> </ul>                                                                                                                                                                                                                                                                                                                                                                                                                                                                                                                                                                                             |
| Grant, 2018 (Epub 2017) [45] | <ul style="list-style-type: none"> <li>- Preoperative, intraoperative and postoperative process measures (Enhanced Recovery after Surgery for colorectal surgery program)</li> </ul>                                                                                                                                                                                                                                                                                                                                                                                                                                                                                                                   |
| Hechenbleikner, 2015 [46]    | <ul style="list-style-type: none"> <li>- Antibiotic prophylaxis</li> <li>- Normothermia</li> <li>- Chlorhexidine washcloth</li> <li>- Skin preparation</li> <li>- Mechanical bowel preparation</li> </ul>                                                                                                                                                                                                                                                                                                                                                                                                                                                                                              |

| <b>First author, year</b> | <b>Clinical interventions (SSI preventive measures)</b>                                                                                                                                                                                                                                                                                                                                                                                                  |
|---------------------------|----------------------------------------------------------------------------------------------------------------------------------------------------------------------------------------------------------------------------------------------------------------------------------------------------------------------------------------------------------------------------------------------------------------------------------------------------------|
| Hedrick, 2007 [47]        | - Antibiotic prophylaxis<br>- Normothermia<br>- Glucose control                                                                                                                                                                                                                                                                                                                                                                                          |
| Hedrick, 2007 [48]        | - Antibiotic prophylaxis<br>- Normothermia<br>- Glucose control                                                                                                                                                                                                                                                                                                                                                                                          |
| Hewitt, 2017 [49]         | - Smoking cessation<br>- Antibiotic prophylaxis<br>- Chlorhexidine gluconate cloths (night before surgery)<br>- Chlorhexidine gluconate cloths (day of surgery)<br>- Normothermia<br>- Hair removal<br>- Skin preparation with Chlorhexidine<br>- Glucose control<br>- Oxygen delivery<br>- Closing tray<br>- Changing gowns, and gloves before fascia closure<br>- Dressing down within 48 hours<br>- Consultation for all ostomies and complex wounds  |
| Kao, 2010 [50]            | - Antibiotic prophylaxis                                                                                                                                                                                                                                                                                                                                                                                                                                 |
| Keenan, 2014 [51]         | - Chlorhexidine shower<br>- Mechanical bowel preparation<br>- Antibiotic prophylaxis<br>- Preparation with chlorhexidine alcohol<br>- Fascial wound protector<br>- Dedicated wound closure tray<br>- Limited OR traffic<br>- Gown and glove change before fascial closure<br>- Glucose control<br>- Normothermia<br>- Removal of sterile dressing within 48 h<br>- Daily washings of incisions with chlorhexidine (postoperative)<br>- Patient education |
| Keenan, 2015 [52]         | - Mechanical bowel preparation<br>- Chlorhexidine wipes<br>- Antibiotic prophylaxis<br>- Surgical field preparation<br>- Limited OR traffic<br>- Normothermia<br>- Euglycemia<br>- Wound protector<br>- Gown and glove change prior closure<br>- Closure trays<br>- Dressing removal within 48 hours<br>- Daily washing of incision with chlorhexidine (postoperative)                                                                                   |
| Kilan, 2017 [53]          | - Antibiotic prophylaxis                                                                                                                                                                                                                                                                                                                                                                                                                                 |
| Knox, 2016 [54]           | - Antibiotic prophylaxis                                                                                                                                                                                                                                                                                                                                                                                                                                 |
| Larochelle, 2011 [55]     | - Antibiotic prophylaxis<br>- Normothermia                                                                                                                                                                                                                                                                                                                                                                                                               |
| Lavu, 2012 [56]           | - Smoking cessation<br>- Chlorhexidine-alcohol skin preparation (pre-admission)<br>- Hair removal<br>- Chlorhexidine-alcohol skin preparation<br>- Antibiotic prophylaxis<br>- Wound edge protection<br>- Glycemic control<br>- Temperature control<br>- Gown and glove change prior closure                                                                                                                                                             |
| Liau, 2010 [57]           | - Hair removal<br>- Antibiotic prophylaxis<br>- Glucose monitoring<br>- Normothermia                                                                                                                                                                                                                                                                                                                                                                     |
| Losh, 2017 [58]           | - Smoking cessation<br>- Diabetic Screening<br>- Antibiotic bowel preparation<br>- Chlorhexidine wipes (Patient)<br>- Chlorhexidine<br>- Antibiotic prophylaxis<br>- Normothermia<br>- Glucose control<br>- Hair removal<br>- Glove change<br>- New instrument tray<br>- Wound protector<br>- Wound irrigation                                                                                                                                           |

| <b>First author, year</b>     | <b>Clinical interventions (SSI preventive measures)</b>                                                                                                                                                                                                                                                                                                                                                                                                                                                                                                                                                        |
|-------------------------------|----------------------------------------------------------------------------------------------------------------------------------------------------------------------------------------------------------------------------------------------------------------------------------------------------------------------------------------------------------------------------------------------------------------------------------------------------------------------------------------------------------------------------------------------------------------------------------------------------------------|
| Lutfiyya, 2012 [59]           | <ul style="list-style-type: none"> <li>- Smoking cessation</li> <li>- Antiseptic skin cleansing (chlorhexidine wipes, night before and morning of surgery)</li> <li>- Mechanical colon preparation</li> <li>- Antibiotic prophylaxis</li> <li>- Diabetic Screening</li> <li>- Glucose control</li> <li>- Hair removal</li> <li>- Normothermia</li> <li>- skin preparation with chlorhexidine gluconate</li> <li>- oxygen delivery</li> <li>- double gloving</li> <li>- pulse lavage of subcutaneous tissues (open operations)</li> <li>- Protect primary-closure incisions with dressing for 5 days</li> </ul> |
| Mammo, 2016 [60]              | <ul style="list-style-type: none"> <li>- Mechanical bowel preparation</li> <li>- Antibiotic prophylaxis</li> <li>- Heparin prophylaxis</li> <li>- Normothermia</li> </ul>                                                                                                                                                                                                                                                                                                                                                                                                                                      |
| Misteli, 2012 [61]            | <ul style="list-style-type: none"> <li>- Antibiotic prophylaxis</li> </ul>                                                                                                                                                                                                                                                                                                                                                                                                                                                                                                                                     |
| Nordin, 2018 (Epub 2017) [62] | <ul style="list-style-type: none"> <li>- Bowel preparation</li> <li>- Abdomen cleansing (wipes, Patient)</li> <li>- Normothermia</li> <li>- Antibiotic prophylaxis</li> <li>- Skin Prep with chlorhexidine or 10% povidone-iodine</li> <li>- Glove change before closure</li> <li>- Redrape surgical field</li> <li>- Remove dirty instruments before closure</li> <li>- Clean instruments for closure</li> </ul>                                                                                                                                                                                              |
| Pastor, 2010 [63]             | <ul style="list-style-type: none"> <li>- Antibiotic prophylaxis</li> <li>- Hair removal</li> <li>- Glucose control</li> <li>- Normothermia</li> </ul>                                                                                                                                                                                                                                                                                                                                                                                                                                                          |
| Pérez-Blanco, 2015 [64]       | <ul style="list-style-type: none"> <li>- shower with chlorhexidine</li> <li>- Glycaemic control</li> <li>- Antibiotic Prophylaxis</li> <li>- Normothermia</li> <li>- Glove change</li> <li>- Surgical wound dressing/cleansing</li> </ul>                                                                                                                                                                                                                                                                                                                                                                      |
| Reames, 2015 [65]             | <ul style="list-style-type: none"> <li>- Antibiotic prophylaxis</li> <li>- Glucose control</li> <li>- Hair removal</li> <li>- Normothermia</li> </ul>                                                                                                                                                                                                                                                                                                                                                                                                                                                          |
| Tanner, 2016 [66]             | <ul style="list-style-type: none"> <li>- Screening and decolonisation for MRSA</li> <li>- Showering with soap</li> <li>- Hair removal</li> <li>- Antibiotic prophylaxis</li> <li>- Skin preparation with chlorhexidine</li> <li>- Normothermia</li> <li>- Antiseptic impregnated incise drapes</li> <li>- Supplemental oxygen</li> <li>- Glucose control</li> </ul>                                                                                                                                                                                                                                            |
| Tillman, 2013 [67]            | <ul style="list-style-type: none"> <li>- Antibiotic prophylaxis</li> <li>- Normothermia</li> <li>- Hair removal</li> </ul>                                                                                                                                                                                                                                                                                                                                                                                                                                                                                     |
| Vogel, 2010 [68]              | <ul style="list-style-type: none"> <li>- Antibiotic prophylaxis</li> <li>- Wound closure/irrigation</li> </ul>                                                                                                                                                                                                                                                                                                                                                                                                                                                                                                 |
| Vu, 2018 (Epub 2017) [69]     | <ul style="list-style-type: none"> <li>- Antibiotic prophylaxis</li> <li>- Mechanical bowel preparation</li> <li>- Normoglycemia</li> </ul>                                                                                                                                                                                                                                                                                                                                                                                                                                                                    |
| Waters, 2017 [70]             | <ul style="list-style-type: none"> <li>- Antibiotic prophylaxis<br/>( venous thromboembolism prophylaxis, urinary catheter removal)</li> </ul>                                                                                                                                                                                                                                                                                                                                                                                                                                                                 |
| Wick, 2012 [71]               | <ul style="list-style-type: none"> <li>- Skin preparation</li> <li>- Chlorhexidine wash cloths</li> <li>- Normothermia</li> <li>- Sterile techniques (instruments, gloves)</li> <li>- Antibiotic prophylaxis</li> </ul>                                                                                                                                                                                                                                                                                                                                                                                        |
| Wick, 2015 [72]               | <ul style="list-style-type: none"> <li>- Smoking cessation</li> <li>- Mechanical bowel preparation</li> <li>- Chlorhexidine bathing</li> <li>- Normothermia</li> <li>- Antibiotic prophylaxis</li> </ul>                                                                                                                                                                                                                                                                                                                                                                                                       |
| Willis, 2016 [73]             | <ul style="list-style-type: none"> <li>- Antibiotic prophylaxis</li> <li>- Local irrigation</li> <li>- Drains</li> </ul>                                                                                                                                                                                                                                                                                                                                                                                                                                                                                       |
