# Supplementary material for: Implementation interventions in preventing surgical site infections in abdominal surgery: a systematic review
Source: Springer Nature journal article supplement (doi:10.1186/s12913-020-4995-z), 2020-03-20
Supplement: MOESM4 [file 17819576]

**Additional file 4**

**Table S4: Reporting of the implementation intervention audit and feedback in N=32 studies**

| Description of “audit and feedback” | Studies                                                                                                                                                                                                                                                                                                           |                                                                                                                                                                                                                                                  |                                                                                                           |                                                                                                                                                                                                                                                                                 |
|-------------------------------------|-------------------------------------------------------------------------------------------------------------------------------------------------------------------------------------------------------------------------------------------------------------------------------------------------------------------|--------------------------------------------------------------------------------------------------------------------------------------------------------------------------------------------------------------------------------------------------|-----------------------------------------------------------------------------------------------------------|---------------------------------------------------------------------------------------------------------------------------------------------------------------------------------------------------------------------------------------------------------------------------------|
|                                     | Bull, 2011 [34]                                                                                                                                                                                                                                                                                                   | Cameron, 2015 [35]                                                                                                                                                                                                                               | Cima, 2013 [36]                                                                                           | Crolla, 2012 [38]                                                                                                                                                                                                                                                               |
| <b>Actors</b>                       | - project officer                                                                                                                                                                                                                                                                                                 | NR                                                                                                                                                                                                                                               | - audits: independent institutional observers<br>- feedback: the team                                     | - infection control nurse, infection control practitioner<br>- multidisciplinary team: surgeons, anesthetists, head of the operating room, operating room personnel, infection control personnel                                                                                |
| <b>Action</b>                       | - checklist accompanying each patient, allowing process compliance and outcome measures to be recorded<br>- compliance with bundle components was overseen<br>- focus groups to discuss progress<br>- clinician meetings: provide updates on documentation and progress of the project, and to reiterate the aims | - audit: antibiotic prescribed and time administered was recorded<br>- initial audit data were presented at a surgical mortality and morbidity meeting<br>- re-audited data were analyzed<br>- efficacy of the poster intervention was presented | - compliance audits: performance was monitored<br>- feedback was provided                                 | - bundle adherence data were used to feedback /development of strategies for improvement<br>- bundle compliance was discussed in a multidisciplinary team<br>- newsletter provided feedback was distributed (results from compliance measurements, improvement recommendations) |
| <b>Action target group</b>          | - compliance overseeing: clinical staff                                                                                                                                                                                                                                                                           | - surgeons and anesthetists                                                                                                                                                                                                                      | - compliance audits: consultant surgeons, residents, nurses, allied health<br>- feedback: the team, staff | - newsletter: all personnel involved in surgical process                                                                                                                                                                                                                        |
| <b>Temporality</b>                  | NR                                                                                                                                                                                                                                                                                                                | - audit: between October 2011/ January 2012<br>- re-audit: May 2012                                                                                                                                                                              | NR                                                                                                        | - adherence measurement: June 2009-October 2011                                                                                                                                                                                                                                 |
| <b>Dose</b>                         | - focus groups: regular                                                                                                                                                                                                                                                                                           | - audit: 21 days<br>- re-audit: 28 days (after intervention)                                                                                                                                                                                     | - feedback: on a monthly basis                                                                            | - bundle adherence measurement: every three months<br>- newsletter: every three months                                                                                                                                                                                          |

| Description of “audit and feedback” | Studies                                                                                                                   |                                                                                                                                                                                                                                                                                                                              |                                                                                                                                                                                                                                                                                                           |                                                                                                                                                                                                                                                                                            |
|-------------------------------------|---------------------------------------------------------------------------------------------------------------------------|------------------------------------------------------------------------------------------------------------------------------------------------------------------------------------------------------------------------------------------------------------------------------------------------------------------------------|-----------------------------------------------------------------------------------------------------------------------------------------------------------------------------------------------------------------------------------------------------------------------------------------------------------|--------------------------------------------------------------------------------------------------------------------------------------------------------------------------------------------------------------------------------------------------------------------------------------------|
|                                     | Elia-Guedea, 2017 [40]                                                                                                    | Forbes, 2008 [41]                                                                                                                                                                                                                                                                                                            | Frenette, 2016 [42]                                                                                                                                                                                                                                                                                       | Garcell, 2017 [43]                                                                                                                                                                                                                                                                         |
| <b>Actors</b>                       | NR                                                                                                                        | - working groups: surgeons, anesthesiologists, nurses, pharmacists from involved patient-care areas<br>- study champions: OR nurse, nurse from same-day surgery                                                                                                                                                              | - annual feedback: medical director of the infection prevention and control department; nursing consultant<br>- feedback after compliance lacking: infection prevention and control department<br>- compliance measurement: infection prevention and control department                                   | compliance monitoring: infection-control practitioner<br>monitoring and presenting: pharmacist                                                                                                                                                                                             |
| <b>Action</b>                       | - clinical sessions in colorectal unit: information about detected problems and instruction on measures to be implemented | - practice audits<br>- performance data were collected for comparison<br>- three working groups to evaluate data from cohort I<br>- performance figures were posted in the OR to provide feedback<br>- study champions: inquired protocol implementation, provided direction, confirmed compliance                           | - annual feedback: individual SSI rates, overall SSI rates for each procedure, recommendations to decrease rates<br>- measuring compliance; if compliance was lacking: feedback and recommendations<br>- pilot audit and feedback project: feedback session, reminders to address identified deficiencies | - compliance monitoring with antibiotic prophylaxis<br>- analysis of department quality indicators<br>- feedback was provided and presented for analysis<br>- monitoring and presenting of antimicrobial consumption<br>- presentation of the antimicrobial stewardship program evaluation |
| <b>Action target group</b>          | - clinical sessions: all surgeons of the colorectal unit                                                                  | - performance figures: OR staff<br>- study champions: nurses, clinicians                                                                                                                                                                                                                                                     | - annual feedback: surgeons<br>feedback after compliance lacking: surgical team<br>- feedback session: heads of surgical departments                                                                                                                                                                      | - feedback: surgical team, facility infection control committee<br>- presentation of the evaluation: the staff                                                                                                                                                                             |
| <b>Temporality</b>                  | NR                                                                                                                        | - first stage: (pre-intervention) collecting data on performance<br>- second stage: evaluate data<br>- final stage: (post-intervention) collecting data on performance, posting performance figures in the OR<br>- working group: meeting during a 1 year period (April 2005 - April 2006)<br>- performance figures: monthly | - began of annual feedback: June 2011<br>- began of compliance measurement and feedback: January 2011<br>- pilot audit and feedback project: October 2013<br>- second audit and feedback session: January - February 2014                                                                                 | NR                                                                                                                                                                                                                                                                                         |
| <b>Dose</b>                         | NR                                                                                                                        | - performance figures: monthly                                                                                                                                                                                                                                                                                               | - feedback: annual, after compliance lacking<br>- compliance measurement: periodically                                                                                                                                                                                                                    | - compliance monitoring: on an ongoing basis<br>- analysis of department quality indicators: monthly<br>- feedback: on monthly basis<br>- presentation of the evaluation: annual                                                                                                           |

| Description of<br>“audit and<br>feedback” | Studies                                                                                               |                                                                                                                                                                                                             |                                              |                                                                                                         |
|-------------------------------------------|-------------------------------------------------------------------------------------------------------|-------------------------------------------------------------------------------------------------------------------------------------------------------------------------------------------------------------|----------------------------------------------|---------------------------------------------------------------------------------------------------------|
|                                           | Geubbels, 2004 [44]                                                                                   | Hechenbleikner, 2015 [46]                                                                                                                                                                                   | Hedrick, 2007 [47]                           | Hedrick, 2007 [48]                                                                                      |
| <b>Actors</b>                             | NR                                                                                                    | chart review: two clinicians                                                                                                                                                                                | NR                                           | NR                                                                                                      |
| <b>Action</b>                             | hospital E:<br>- monitoring of antibiotic prophylaxis<br>and SSI incidence<br>- results were reported | - auditing tool to assess compliance<br>- retrospective chart review with the<br>auditing tool<br>- identified defects were discussed<br>- meetings: addressing poor<br>compliance and patient care defects | - feedback: compliance and infection<br>rate | - monitoring outcomes measures<br>- individual feedback<br>- feedback: compliance and infection<br>rate |
| <b>Action target<br/>group</b>            | - result reporting: surgeons                                                                          | - defect discussion: providers<br>responsible for implementing measures                                                                                                                                     | NR                                           | - feedback: provider                                                                                    |
| <b>Temporality</b>                        | NR                                                                                                    | NR                                                                                                                                                                                                          | NR                                           | - feedback: starts February 2005                                                                        |
| <b>Dose</b>                               | - surveillance: ongoing<br>- result reporting: every 6 months                                         | - meetings addressing poor<br>compliance: weekly                                                                                                                                                            | - feedback: monthly                          | - feedback: monthly                                                                                     |

| Description of “audit and feedback” | Studies                                                                                                                                                                         |                                                                                                         |                                                                                                                                                                                                                                                                                                                                                                                                          |                                                                                                                                  |
|-------------------------------------|---------------------------------------------------------------------------------------------------------------------------------------------------------------------------------|---------------------------------------------------------------------------------------------------------|----------------------------------------------------------------------------------------------------------------------------------------------------------------------------------------------------------------------------------------------------------------------------------------------------------------------------------------------------------------------------------------------------------|----------------------------------------------------------------------------------------------------------------------------------|
|                                     | Kao, 2010 [50]                                                                                                                                                                  | Keenan, 2014 [51]                                                                                       | Keenan, 2015 [52]                                                                                                                                                                                                                                                                                                                                                                                        | Kilan, 2017 [53]                                                                                                                 |
| <b>Actors</b>                       | - compliance measures: trained research personnel                                                                                                                               | -meetings: colorectal surgeon (program leader)                                                          | - outcome abstraction: trained surgical-clinical reviewer<br>- overseeing implementation: colorectal surgeon<br>- meetings: colorectal surgeon, key personnel from each discipline<br>- colorectal surgery leadership meetings: colorectal surgery leadership, members of the multidisciplinary team                                                                                                     | - feedback: quality improvement staff                                                                                            |
| <b>Action</b>                       | - compliance was measured<br>- extended timeout<br>-planned feedback                                                                                                            | - meetings: review SSI results, address problems with bundle delivery<br>- audits of the bundle program | - outcome abstraction from medical record, conducting chart review<br>- obtaining compliance data from an institutional database<br>- overseeing implementation and program progress<br>- meetings: receive feedback on compliance, encourage compliance, review outcome data<br>- colorectal surgery leadership meetings: reinforce program objectives, identify problems, improve program coordination | - compliance feedback was given; reports that highlighted compliance<br>- personal reminders after non-compliance was identified |
| <b>Action target group</b>          | - feedback: faculty                                                                                                                                                             | -meetings: designated key personnel                                                                     | NR                                                                                                                                                                                                                                                                                                                                                                                                       | - reminders: non-compliant providers<br>- feedback: the team                                                                     |
| <b>Temporality</b>                  | - second study period (March-August 2008): intervention in hospital 1 (6 month)<br>- third study period (August 2008-November 2009): intervention in hospital 1 and 2 (6 month) | - audits: study period                                                                                  | NR                                                                                                                                                                                                                                                                                                                                                                                                       | - feedback: implemented during April 2015 – July 2015<br>- reminders: implemented during April 2015 – July 2015                  |
| <b>Dose</b>                         | NR                                                                                                                                                                              | - meetings: monthly                                                                                     | - meetings: monthly<br>- colorectal surgery leadership meetings: frequently                                                                                                                                                                                                                                                                                                                              | - feedback: regular / monthly<br>- reports: monthly                                                                              |

| Description of “audit and feedback” | Studies                                                                                               |                                                                                                                                                                                           |                                                                                                                                                                                                                                                                                      |                                                                                                                                                                                                                                                                                                                                                                                                                                                                                                                                                    |
|-------------------------------------|-------------------------------------------------------------------------------------------------------|-------------------------------------------------------------------------------------------------------------------------------------------------------------------------------------------|--------------------------------------------------------------------------------------------------------------------------------------------------------------------------------------------------------------------------------------------------------------------------------------|----------------------------------------------------------------------------------------------------------------------------------------------------------------------------------------------------------------------------------------------------------------------------------------------------------------------------------------------------------------------------------------------------------------------------------------------------------------------------------------------------------------------------------------------------|
|                                     | Larochelle, 2011 [55]                                                                                 | Liau, 2010 [57]                                                                                                                                                                           | Losh, 2017 [58]                                                                                                                                                                                                                                                                      | Lutfiyya, 2012 [59]                                                                                                                                                                                                                                                                                                                                                                                                                                                                                                                                |
| <b>Actors</b>                       | - performance monitoring: committees                                                                  | - spread good results: hospital leadership                                                                                                                                                | - preoperative compliance tracking: office staff member                                                                                                                                                                                                                              | NR                                                                                                                                                                                                                                                                                                                                                                                                                                                                                                                                                 |
| <b>Action</b>                       | - audit system with feedback<br>- performance was monitored<br>- compliance rates were made available | - compliance audit: tracking process measures and reporting findings<br>- visually reporting of updates in chart format<br>- good improvement results of the pilot population were spread | - SSI collaborative meetings compliance was tracked, presented, discussed<br>- SSI root cause analysis: monitoring breakdown of implemented measures<br>- OR meetings: sharing SSI rates, track and encourage compliance, discuss strategies to improve adherence and safety culture | - reviewing process measures and SSI cases, addressing gaps<br>- calculating SSI rate, developing a run chart, establishing reports<br>- SSI Quality Group meetings: data tracking<br>- departmental meetings: reviewing outcomes<br>- a report was provided if a measure was omitted<br>- individual feedback was provided if defects were identified<br>- posting SSI dashboards in surgeon and operating room lounges<br>- monitored components were posted in surgical and physicians lounges<br>- reporting performance comparison with peers |
| <b>Action target group</b>          | NR                                                                                                    | - reporting: the staff<br>- updates in chart format: all staff in the OR, post-anesthesia care unit, wards<br>- spread good results: to other surgical disciplines                        | - OR meetings: surgery staff                                                                                                                                                                                                                                                         | - SSI Quality Group meetings: all appropriate care providers<br>- reporting of peer comparison: all involved stakeholders: administrators, surgeons, nursing staff, infection control, SSI Quality Committee<br>- standardized report: surgeons<br>- individual feedback: groups of providers                                                                                                                                                                                                                                                      |
| <b>Temporality</b>                  | - compliance rates were made available: starting in 2004                                              | NR                                                                                                                                                                                        | NR                                                                                                                                                                                                                                                                                   | NR                                                                                                                                                                                                                                                                                                                                                                                                                                                                                                                                                 |
| <b>Dose</b>                         | - compliance rates were made available: quarterly                                                     | - tracking process measures: on a monthly basis<br>- reporting: regularly<br>- updates in chart format: frequently                                                                        | - SSI collaborative meetings: monthly<br>- OR meetings: monthly<br>- chart reviews: quarterly                                                                                                                                                                                        | - SSI rate calculation: every month<br>- reports: quarterly<br>- review of SSI/process measures: on a monthly basis /regular basis<br>- SSI Quality Group’s meetings: monthly                                                                                                                                                                                                                                                                                                                                                                      |

| Description of “audit and feedback” | Studies                                                                                 |                                                                                                                                                                                 |                                                                                                                                  |                                                                                                                                                                                                  |
|-------------------------------------|-----------------------------------------------------------------------------------------|---------------------------------------------------------------------------------------------------------------------------------------------------------------------------------|----------------------------------------------------------------------------------------------------------------------------------|--------------------------------------------------------------------------------------------------------------------------------------------------------------------------------------------------|
|                                     | Nordin, 2018 (Epub 2017) [62]                                                           | Pastor, 2010 [63]                                                                                                                                                               | Pérez-Blanco, 2015 [64]                                                                                                          | Reames, 2015 [65]                                                                                                                                                                                |
| <b>Actors</b>                       | NR                                                                                      | recording compliance: infection control professional monitoring: multidisciplinary task force (surgeons, anesthesiologists, infection control personnel, intraoperative nurses) | NR                                                                                                                               | - compliance monitoring: operative teams                                                                                                                                                         |
| <b>Action</b>                       | - monitoring and analyzing bundle compliance<br>- feedback was provided                 | - compliance was recorded<br>- individual compliance rates and infections were collected and reviewed<br>- meetings: compliance monitoring and addressing barriers              | - collecting variables related to adherence<br>- evaluating adherence to protocol<br>- commitment to provide feedback on results | - outcome measurement and feedback<br>- compliance monitoring<br>- routine briefings and debriefings<br>- content and coaching calls<br>- semiannual daylong collaborative meetings              |
| <b>Action target group</b>          | NR                                                                                      | NR                                                                                                                                                                              | NR                                                                                                                               | - content and coaching calls / collaborative meetings: operative team leaders (in each hospital: surgeon, anesthesiologist, operating room nurse)<br>- briefings and debriefings: surgical teams |
| <b>Temporality</b>                  | - monitoring and analyzing bundle compliance: start in August 2014                      | - multidisciplinary task force: April 2006                                                                                                                                      | NR                                                                                                                               | NR                                                                                                                                                                                               |
| <b>Dose</b>                         | - monitoring and analyzing bundle compliance: on a monthly basis<br>- feedback: ongoing | - recording compliance: on a weekly basis<br>- meetings: monthly<br>- review of compliance rates and infections: monthly                                                        | - feedback: at least biannually                                                                                                  | - content and coaching calls: monthly<br>- collaborative meetings: semiannual daylong                                                                                                            |

| Description of “audit and feedback” | Studies                                                                                                                                         |                                                                                                         |                                                                                                                                                                                                                                                         |                                                                                                                                                                                                                                                                                                                                                                                                                                                                                      |
|-------------------------------------|-------------------------------------------------------------------------------------------------------------------------------------------------|---------------------------------------------------------------------------------------------------------|---------------------------------------------------------------------------------------------------------------------------------------------------------------------------------------------------------------------------------------------------------|--------------------------------------------------------------------------------------------------------------------------------------------------------------------------------------------------------------------------------------------------------------------------------------------------------------------------------------------------------------------------------------------------------------------------------------------------------------------------------------|
|                                     | Tanner, 2016[66]                                                                                                                                | Tillman, 2013 [67]                                                                                      | Vogel, 2010 [68]                                                                                                                                                                                                                                        | Vu, 2018 (Epub 2017) [69]                                                                                                                                                                                                                                                                                                                                                                                                                                                            |
| <b>Actors</b>                       | - compliance measurement: project assistant<br>- SSI measurement: surveillance team                                                             | monitoring: multidisciplinary team                                                                      | NR                                                                                                                                                                                                                                                      | site visits: project leaders, committed clinicians<br>progress discussion: members from participating hospitals                                                                                                                                                                                                                                                                                                                                                                      |
| <b>Action</b>                       | - compliance with interventions and SSIs were measured<br>- feedback: compliance data and SSI rates were posted in key areas (e.g. scrub rooms) | - monitoring and coaching<br>- collecting and reporting compliance and outcome data                     | - outcomes were recorded<br>- morbidity and mortality (M+M) conferences: discussing data, developing a new strategy and a benchmark was carried out<br>- reporting annual results in an conference<br>- implementation of the new strategy was reviewed | - audit and feedback system for adherence<br>- measuring compliance and SSI rates<br>- auditing system: providing de-identified feedback on personal SSI bundle compliance/SSI rates<br>- assigning bundle compliance scores to hospitals<br>- compliance tracking allows: normative performance feedback compared with other hospitals<br>- site visits: observing perioperative care processes (process adoption real time checks)<br>- discussing progress and refining new ideas |
| <b>Action target group</b>          | NR                                                                                                                                              | - monitoring and coaching: surgical teams<br>- reporting compliance and outcome data: regulatory bodies | NR                                                                                                                                                                                                                                                      | - auditing system: all providers<br>- feedback: surgeons, hospitals<br>- site visits: high-and low-performers                                                                                                                                                                                                                                                                                                                                                                        |
| <b>Temporality</b>                  | NR                                                                                                                                              | NR                                                                                                      | NR                                                                                                                                                                                                                                                      | NR                                                                                                                                                                                                                                                                                                                                                                                                                                                                                   |
| <b>Dose</b>                         | - feedback: monthly                                                                                                                             | NR                                                                                                      | - M+M conferences: 1-2 monthly<br>- conference: annual                                                                                                                                                                                                  | - site visits: six over study period<br>- progress discussion: frequently                                                                                                                                                                                                                                                                                                                                                                                                            |

| Description of<br>“audit and<br>feedback” | Studies                                                                                                                                                                                                                                                                          |                                                                                                                                                                                                                                                                                                                                                                          |                                                                                                                             |                                                                                                       |
|-------------------------------------------|----------------------------------------------------------------------------------------------------------------------------------------------------------------------------------------------------------------------------------------------------------------------------------|--------------------------------------------------------------------------------------------------------------------------------------------------------------------------------------------------------------------------------------------------------------------------------------------------------------------------------------------------------------------------|-----------------------------------------------------------------------------------------------------------------------------|-------------------------------------------------------------------------------------------------------|
|                                           | Waters, 2017 [70]                                                                                                                                                                                                                                                                | Wick, 2012 [71]                                                                                                                                                                                                                                                                                                                                                          | Wick, 2015 [72]                                                                                                             | Willis, 2016 [73]                                                                                     |
| <b>Actors</b>                             | - data collection: trained unbiased nurse/ physician's assistant                                                                                                                                                                                                                 | - meetings: Comprehensive Unit-Based Safety Program (CUSP) leadership team (representative from surgery, nursing, anesthesia; team coach; hospital executive) and the CUSP team (interested nurses, certified registered nurse anesthetists, scrub technicians, anesthesiologists; 36 people)<br>- compliance monitoring: CUSP coach<br>- feedback: front-line providers | - monitoring: senior leaders                                                                                                | NR                                                                                                    |
| <b>Action</b>                             | - data collection on all procedures<br>-surgeon-specific feedback: adherence, outcomes<br>- individualized feedback and feedback at department level<br>- individual results, and comparison with: other surgeons results, departmental results, historical departmental results | - conducting compliance audits<br>- collection of SSI rates and compliance<br>- meetings: review progress, give performance feedback, conduct defect discussions, readjust implementation strategies                                                                                                                                                                     | - monitoring results<br>- compliance data were reviewed<br>- dashboard: communicating pathway process and outcomes measures | - calculating and assessing adherence rate<br>- performance reports: overall and individual adherence |
| <b>Action target group</b>                | - feedback: eight surgeons (colon and rectal)                                                                                                                                                                                                                                    | NR                                                                                                                                                                                                                                                                                                                                                                       | - compliance data review: providers<br>- dashboard: senior leadership, frontline providers                                  | - performance reports: pediatric surgeons                                                             |
| <b>Temporality</b>                        | NR                                                                                                                                                                                                                                                                               | NR                                                                                                                                                                                                                                                                                                                                                                       | NR                                                                                                                          | NR                                                                                                    |
| <b>Dose</b>                               | - feedback: biannual                                                                                                                                                                                                                                                             | - compliance audits: every few month<br>- meetings/feedback: monthly                                                                                                                                                                                                                                                                                                     | - dashboard: monthly                                                                                                        | - performance reports: monthly                                                                        |

Notes: NR: Not reported
